# Supplementary material for: Systematic validation of structural brain networks in cerebral small vessel disease
Source: PubMed Central journal article supplement — J Cereb Blood Flow Metab. 2021 Dec 20;42(6):1020–32. doi: 10.1177/0271678X211069228 (PMC9125482; doi:10.1177/0271678x211069228), 2021-12-20
Supplement: sj-pdf-1-jcb-10.1177_0271678X211069228.pdf [file sj-pdf-1-jcb-10.1177_0271678X211069228.pdf]

**Table e-1:** MRI acquisition parameters

| Sequence        | Feature                       | RUN DMC – InTENse<br>sub-study | RUN DMC<br>main study                                   |
|-----------------|-------------------------------|--------------------------------|---------------------------------------------------------|
|                 | Scanner                       | Magnetom Prisma                |                                                         |
|                 | Coil channels                 | 32 (head)                      |                                                         |
| <b>MP2RAGE</b>  | Type                          | Conventional                   | Compressed sensing                                      |
|                 | TR [ms]                       | 5500                           | 5000                                                    |
|                 | TE [ms]                       | 3.8                            | 2.98                                                    |
|                 | TI [ms]                       | 700, 2500 <sup>a</sup>         | 732, 2500 <sup>a</sup>                                  |
|                 | Flip angle [°]                | 7, 4 <sup>a</sup>              | 4, 5 <sup>a</sup>                                       |
|                 | Voxel size [mm]               | 0.85 isotropic                 |                                                         |
| <b>3D-FLAIR</b> | TR [ms]                       | 5000                           |                                                         |
|                 | TE [ms]                       | 394                            |                                                         |
|                 | TI [ms]                       | 1800                           |                                                         |
|                 | Voxel size [mm]               | 0.85 isotropic                 |                                                         |
| <b>3D-GRE</b>   | TR [ms]                       | 35                             | 44                                                      |
|                 | TE [ms]                       | 29.5                           | 6.14, 10.1, 14.1, 18.1, 22.1,<br>26.1, 30.1, 34.1, 38.1 |
|                 | Flip angle [°]                | 15                             | 20                                                      |
|                 | Voxel size [mm]               | 0.8 x 0.8 x 2                  | 0.8 isotropic                                           |
| <b>MS-DWI</b>   | TR [ms]                       | 3220                           |                                                         |
|                 | TE [ms]                       | 74                             |                                                         |
|                 | Flip angle [°]                | 90                             |                                                         |
|                 | In-plane resolution [mm]      | 1.7 x 1.7                      |                                                         |
|                 | Slice thickness [mm]          | 1.7                            |                                                         |
|                 | Base resolution (matrix)      | 130                            |                                                         |
|                 | Number of slices              | 87                             |                                                         |
|                 | b-values [s/mm <sup>2</sup> ] | 1000, 3000                     |                                                         |
|                 | Directions (per b-value)      | 30, 60                         |                                                         |
|                 | b=0 [images]                  | 10                             |                                                         |
|                 | Receiver bandwidth [Hz/px]    | 1924                           |                                                         |
|                 | Parallel acceleration         | 2                              |                                                         |
|                 | Multi-band acceleration       | 3                              |                                                         |

<sup>a</sup> Double inversion

Abbreviations: FLAIR = fluid-attenuated inversion recovery; GRE = gradient echo; inTENse = Radboud University Nijmegen Diffusion tensor and Magnetic resonance imaging Cohort – Investigating The origin and Evolution of cerebral small vessel disease; MP2RAGE = magnetization prepared 2 rapid acquisition gradient echoes; MS-DWI = multi-shell diffusion-weighted imaging; RUN DMC = Radboud University Nijmegen Diffusion tensor and Magnetic resonance imaging Cohort; TE = echo time; TI = inversion time; TR = repetition time.

**Table e-2:** Simple linear regression models

|                    |                           | Single-shell |       |            |         |       |        |       | Multi-shell |       |       |            |       |       |        |       |       |       |       |
|--------------------|---------------------------|--------------|-------|------------|---------|-------|--------|-------|-------------|-------|-------|------------|-------|-------|--------|-------|-------|-------|-------|
|                    |                           | Skeleton     |       |            | Network |       |        |       | Skeleton    |       |       | Network    |       |       |        |       |       |       |       |
|                    |                           | FA           | MD    | Atlas      | nSL     | mLen  | invLen | mFA   | wFA         | MK    | RK    | Atlas      | nSL   | mLen  | invLen | mMK   | wMK   | mFA   | wFA   |
| <b>Exploration</b> | <b>adj. R<sup>2</sup></b> | 0.066        | 0.080 | <b>AAL</b> | 0.109   | 0.073 | 0.079  | 0.077 | 0.111       | 0.176 | 0.151 | <b>AAL</b> | 0.125 | 0.059 | 0.027  | 0.117 | 0.025 | 0.011 | 0.134 |
|                    | <b>P</b>                  | 0.037        | 0.024 |            | 0.010   | 0.030 | 0.025  | 0.026 | 0.009       | 0.001 | 0.003 |            | 0.006 | 0.046 | 0.127  | 0.007 | 0.136 | 0.219 | 0.004 |
|                    | <b>adj. R<sup>2</sup></b> | -            | -     | <b>BN</b>  | 0.098   | 0.056 | 0.095  | 0.082 | 0.088       | -     | -     | <b>BN</b>  | 0.153 | 0.058 | 0.019  | 0.111 | 0.040 | 0.020 | 0.199 |
|                    | <b>P</b>                  | -            | -     |            | 0.014   | 0.050 | 0.015  | 0.023 | 0.019       | -     | -     |            | 0.002 | 0.046 | 0.167  | 0.009 | 0.084 | 0.158 | 0.001 |
| <b>Validation</b>  | <b>adj. R<sup>2</sup></b> | 0.128        | 0.086 | <b>AAL</b> | 0.145   | 0.097 | 0.136  | 0.100 | 0.158       | 0.130 | 0.143 | <b>AAL</b> | 0.066 | 0.145 | 0.066  | 0.135 | 0.121 | 0.114 | 0.036 |
|                    | <b>P</b>                  | 0.000        | 0.001 |            | 0.000   | 0.001 | 0.000  | 0.001 | 0.000       | 0.000 | 0.000 |            | 0.005 | 0.000 | 0.005  | 0.000 | 0.000 | 0.000 | 0.030 |
|                    | <b>adj. R<sup>2</sup></b> | -            | -     | <b>BN</b>  | 0.133   | 0.127 | 0.126  | 0.146 | 0.141       | -     | -     | <b>BN</b>  | 0.003 | 0.125 | 0.084  | 0.136 | 0.102 | 0.124 | 0.001 |
|                    | <b>P</b>                  | -            | -     |            | 0.000   | 0.000 | 0.000  | 0.000 | 0.000       | -     | -     |            | 0.259 | 0.000 | 0.002  | 0.000 | 0.001 | 0.000 | 0.296 |

Abbreviations: adj. = adjusted; AAL = automated anatomical labelling; BN = Brainnetome; FA = fractional anisotropy; invLen = number of streamlines weighted by the inverse length of each streamline; MD = mean diffusivity; mFA = mean of fractional anisotropy of streamlines; MK = mean kurtosis; mLen= mean length of streamlines; mMK = mean of mean kurtosis of streamlines; nSL = number of streamlines; RK = radial kurtosis; wFA= number of streamlines weighted by fractional anisotropy; wMK = number of streamlines weighted by mean kurtosis.

**Table e-3:** Linear mixed effects models

|             |                   | Single-shell |       |            |         |       |        |       | Multi-shell |       |       |            |       |       |        |       |       |       |       |
|-------------|-------------------|--------------|-------|------------|---------|-------|--------|-------|-------------|-------|-------|------------|-------|-------|--------|-------|-------|-------|-------|
|             |                   | Skeleton     |       |            | Network |       |        |       | Skeleton    |       |       | Network    |       |       |        |       |       |       |       |
|             |                   | FA           | MD    | Atlas      | nSL     | mLen  | invLen | mFA   | wFA         | MK    | RK    | Atlas      | nSL   | mLen  | invLen | mMK   | wMK   | mFA   | wFA   |
| Exploration | fix. ef.          | 0.005        | 0.004 | <b>AAL</b> | 0.000   | 0.000 | 0.000  | 0.002 | 0.001       | 0.004 | 0.006 | <b>AAL</b> | 0.002 | 0.002 | 0.001  | 0.003 | 0.002 | 0.004 | 0.001 |
|             | <i>P</i>          | 0.000        | 0.000 |            | 0.470   | 0.663 | 0.751  | 0.001 | 0.136       | 0.000 | 0.000 |            | 0.000 | 0.000 | 0.095  | 0.000 | 0.000 | 0.000 | 0.038 |
|             | m. R <sup>2</sup> | 0.219        | 0.140 |            | 0.002   | 0.000 | 0.000  | 0.031 | 0.007       | 0.107 | 0.248 |            | 0.022 | 0.035 | 0.009  | 0.087 | 0.037 | 0.108 | 0.008 |
|             | fix. ef.          | -            | -     | <b>BN</b>  | 0.000   | 0.001 | 0.000  | 0.002 | 0.001       | -     | -     | <b>BN</b>  | 0.002 | 0.003 | 0.000  | 0.003 | 0.002 | 0.004 | 0.001 |
|             | <i>P</i>          | -            | -     |            | 0.831   | 0.254 | 0.713  | 0.003 | 0.384       | -     | -     |            | 0.000 | 0.000 | 0.570  | 0.000 | 0.000 | 0.000 | 0.150 |
|             | m. R <sup>2</sup> | -            | -     |            | 0.000   | 0.003 | 0.000  | 0.019 | 0.002       | -     | -     |            | 0.033 | 0.056 | 0.001  | 0.091 | 0.043 | 0.149 | 0.004 |
| Validation  | fix. ef.          | 0.004        | 0.004 | <b>AAL</b> | 0.002   | 0.000 | 0.001  | 0.001 | 0.002       | 0.003 | 0.004 | <b>AAL</b> | 0.002 | 0.003 | 0.002  | 0.002 | 0.003 | 0.003 | 0.002 |
|             | <i>P</i>          | 0.000        | 0.000 |            | 0.003   | 0.701 | 0.093  | 0.095 | 0.000       | 0.000 | 0.000 |            | 0.001 | 0.000 | 0.000  | 0.000 | 0.000 | 0.000 | 0.000 |
|             | m. R <sup>2</sup> | 0.129        | 0.107 |            | 0.027   | 0.000 | 0.008  | 0.008 | 0.046       | 0.085 | 0.136 |            | 0.031 | 0.074 | 0.036  | 0.047 | 0.065 | 0.060 | 0.033 |
|             | fix. ef.          | -            | -     | <b>BN</b>  | 0.001   | 0.000 | 0.000  | 0.001 | 0.001       | -     | -     | <b>BN</b>  | 0.002 | 0.003 | 0.002  | 0.002 | 0.003 | 0.003 | 0.002 |
|             | <i>P</i>          | -            | -     |            | 0.086   | 0.697 | 0.357  | 0.240 | 0.011       | -     | -     |            | 0.001 | 0.000 | 0.000  | 0.000 | 0.000 | 0.000 | 0.000 |
|             | m. R <sup>2</sup> | -            | -     |            | 0.007   | 0.000 | 0.002  | 0.003 | 0.015       | -     | -     |            | 0.031 | 0.074 | 0.036  | 0.047 | 0.065 | 0.060 | 0.033 |

Abbreviations: adj. = adjusted; AAL = automated anatomical labelling; BN = Brainnetome; FA = fractional anisotropy; fix. ef. = fixed effect; invLen = number of streamlines weighted by the inverse length of each streamline; MD = mean diffusivity; mFA = mean of fractional anisotropy of streamlines; MK = mean kurtosis; mLen= mean length of streamlines; mMK = mean of mean kurtosis of streamlines; m. R<sup>2</sup> = marginal R<sup>2</sup>; nSL = number of streamlines; RK = radial kurtosis; wFA= number of streamlines weighted by fractional anisotropy; wMK = number of streamlines weighted by mean kurtosis.

**Table e4:** Intraclass correlation coefficients

|                    | Single-shell |       |            |       |         |        |       |       | Multi-shell |       |            |       |         |        |       |       |       |       |
|--------------------|--------------|-------|------------|-------|---------|--------|-------|-------|-------------|-------|------------|-------|---------|--------|-------|-------|-------|-------|
|                    | Skeleton     |       |            |       | Network |        |       |       | Skeleton    |       |            |       | Network |        |       |       |       |       |
|                    | FA           | MD    | Atlas      | nSL   | mLen    | invLen | mFA   | wFA   | MK          | RK    | Atlas      | nSL   | mLen    | invLen | mMK   | wMK   | mFA   | wFA   |
| <b>Exploration</b> | 0.981        | 0.989 | <b>AAL</b> | 0.958 | 0.883   | 0.951  | 0.958 | 0.963 | 0.973       | 0.988 | <b>AAL</b> | 0.923 | 0.916   | 0.560  | 0.974 | 0.896 | 0.982 | 0.921 |
|                    | -            | -     | <b>BN</b>  | 0.949 | 0.944   | 0.939  | 0.965 | 0.953 | -           | -     | <b>BN</b>  | 0.900 | 0.900   | 0.675  | 0.979 | 0.882 | 0.985 | 0.894 |
| <b>Validation</b>  | 0.967        | 0.979 | <b>AAL</b> | 0.969 | 0.921   | 0.960  | 0.944 | 0.973 | 0.956       | 0.984 | <b>AAL</b> | 0.923 | 0.927   | 0.794  | 0.958 | 0.906 | 0.974 | 0.899 |
|                    | -            | -     | <b>BN</b>  | 0.955 | 0.946   | 0.947  | 0.963 | 0.960 | -           | -     | <b>BN</b>  | 0.849 | 0.886   | 0.767  | 0.971 | 0.835 | 0.977 | 0.791 |

Abbreviations: AAL = automated anatomical labelling; BN = Brainnetome; FA = fractional anisotropy; invLen = number of streamlines weighted by the inverse length of each streamline; MD = mean diffusivity; mFA = mean of fractional anisotropy of streamlines; MK = mean kurtosis; mLen= mean length of streamlines; mMK = mean of mean kurtosis of streamlines; nSL = number of streamlines; RK = radial kurtosis; wFA= number of streamlines weighted by fractional anisotropy; wMK = number of streamlines weighted by mean kurtosis.
